# Supplementary material
Source: publisher figshare collection journal article supplement (https://karger.figshare.com/articles/dataset/_/7105181)
Supplement: Supplementary file 1 [file 1]

Archive with 4 entries (4 files):
- UIN_201807033_0_7_Supplementary_Material.docx
- UIN_201807033_0_7_Supplementary_Material_PDF.PDF
- UIN_201807033_1_s_2_supplementary_figure_1.tif
- UIN_201807033_1_s_2_supplementary_figure_1_PDF.PDF
