# Supplementary material
Source: publisher figshare collection journal article supplement (https://karger.figshare.com/articles/dataset/_/7105181)

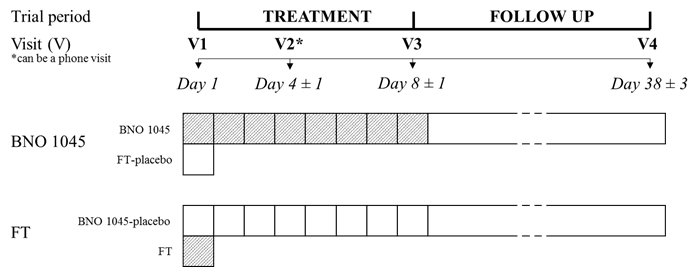

Supplement: Supplementary file 1 [file 1 › UIN_201807033_1_s_2_supplementary_figure_1.tif]

Trial period

Visit (V)

\*can be a phone visit

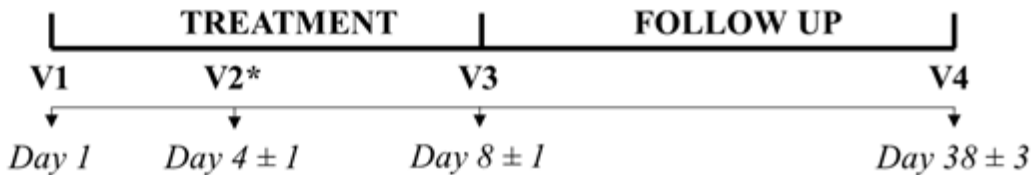

BNO 1045

BNO 1045

FT-placebo

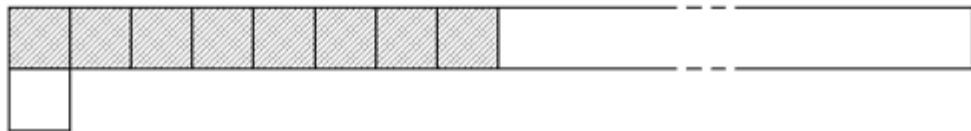

FT

BNO 1045-placebo

FT

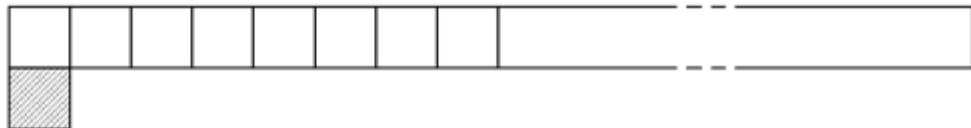

Supplement: Supplementary file 1 [file 1 › UIN_201807033_1_s_2_supplementary_figure_1_PDF.PDF]
